# Supplementary material for: The Mammalian “Obesogen” Tributyltin Targets Hepatic Triglyceride Accumulation and the Transcriptional Regulation of Lipid Metabolism in the Liver and Brain of Zebrafish
Source: PubMed Central journal article supplement (PMC4669123; doi:10.1371/journal.pone.0143911), 2015-12-03
Supplement: pone.0143911.s002.pdf [file pone.0143911.s002.pdf]

## **S1 Appendix. Quantification of organotins in zebrafish liver.**

Following hepatic triglyceride content quantification, the remaining liver tissues of zebrafish per treatment and gender were lyophilized and pooled together to achieve a total weight of 0.05g. Samples were then extracted with 2ml solution of 1:1 (v/v) 6M HCl/ethanol in a static ultrasonic bath for 2h and 50  $\mu$ l of the supernatant was brought to a final volume of 10 ml and analysed by headspace SPME-GC-MS/MS for tributyltin and its metabolites dibutyltin (DBT) and monobutyltin (MBT) as described in Carvalho et al. (2007) [48].
