# Supplementary material for: The Mammalian “Obesogen” Tributyltin Targets Hepatic Triglyceride Accumulation and the Transcriptional Regulation of Lipid Metabolism in the Liver and Brain of Zebrafish
Source: PubMed Central journal article supplement (PMC4669123; doi:10.1371/journal.pone.0143911), 2015-12-03
Supplement: pone.0143911.s003.pdf [file pone.0143911.s003.pdf]

**S1 Table. TBT concentration in the water.** Evaluation of the concentration of Tributyltin (TBT), Dibutyltin (DBT) and Monobutyltin (MBT) in the water from the 50 ng/L TBT (as Sn) exposure tanks at 20 days post fertilization. The aquaria were dosed twice daily (at 0 and 8 hours).

| Sampling time<br>(hours) | MBT<br>(ng/L) | DBT<br>(ng/L) | TBT<br>(ng/L) |
|--------------------------|---------------|---------------|---------------|
| 0h                       | n.d.          | n.d.          | 37.2±6.5      |
| 8h                       | 6.8±3.5       | n.d.          | 8.1±6.1       |
| 24h                      | 26.8±13.4     | n.d.          | 3.1±1.1       |

Values as mean±SEM (n=2). 0h: 15 minutes after the first dosing; 8h: just before the second dosing; 24h: before the first next-day dosing. Detection limits (ng/L as Sn): MBT (3.4); DBT (2.5); TBT (2.0)
