# Supplementary material for: The Mammalian “Obesogen” Tributyltin Targets Hepatic Triglyceride Accumulation and the Transcriptional Regulation of Lipid Metabolism in the Liver and Brain of Zebrafish
Source: PubMed Central journal article supplement (PMC4669123; doi:10.1371/journal.pone.0143911), 2015-12-03
Supplement: pone.0143911.s004.pdf [file pone.0143911.s004.pdf]

**S2 Table. Zebrafish mortality.** Mortality rate in zebrafish exposed to TBT (as Sn) at 60 days post fertilization (dpf).

| Exposure        | Mortality (%) |
|-----------------|---------------|
| Control         | 34.5          |
| Solvent control | 28.7          |
| TBT 10 ng/L     | 33.8          |
| TBT 50 ng/L     | 41.2          |
