# Supplementary material for: The Mammalian “Obesogen” Tributyltin Targets Hepatic Triglyceride Accumulation and the Transcriptional Regulation of Lipid Metabolism in the Liver and Brain of Zebrafish
Source: PubMed Central journal article supplement (PMC4669123; doi:10.1371/journal.pone.0143911), 2015-12-03
Supplement: pone.0143911.s005.pdf [file pone.0143911.s005.pdf]

**S3 Table. Primer pair sequences used for RT-qPCR analysis.**

| Gene                      | Genbank access # | Forward primer (5' - 3') | Reverse primer (5' - 3') |
|---------------------------|------------------|--------------------------|--------------------------|
| RXR $\alpha$ /a           | NM_001161551     | ATTCAATGGC'ATCTCCTG      | GCGGCTTAATATCCTCTG       |
| PPAR $\gamma$             | NM_131467        | GGTTTCATTACGGCGTTCAC     | TGGTTCACGTCACTGGAGAA     |
| C/EBP $\alpha$            | NM_131885        | AACGGAGCGAGCTTGACTT      | AAATCATGCCATTAGCTGC      |
| C/EBP $\beta$             | NM_131884.2      | CTACCTCGCTTCCACAGCA      | TCGCTGTAGATTCCCAGTGC     |
| SREBP1                    | NM_001105129.1   | CAGAGGGTGGGCATGCTGGC     | ATGTGACGGTGGTGCCGCTG     |
| ChREBP                    | XM_001338467.2   | ATCCCAGGGAGATCGCTCAT     | TGCTGCTGGTTAAGGGAGTG     |
| DGAT2                     | NM_001030196     | TGGGGCTTTTTGTAACCTCG     | TCTTCCTGGTGCACAGTCC      |
| FASn                      | XM_682295        | ATCTGTTCCTGTTTCGATGGC    | AGCATATCTCGGCTGACGTT     |
| ACC $\alpha$              | NM_001271308.1   | AGAGAGGGCAGGTTTTACCA     | GCCATCATACGAGAGCAACA     |
| ACOX1                     | BC097101.1       | GCACGGATGTGTGTACCGTGC    | GCGTCCAGAGCCCCTTGACCT    |
| 11 $\beta$ -HSD2          | NM_212720.2      | CCTTCAGGTGAGCATCCCTT     | CCTCCAGAAGGTTTGGGGAC     |
| 11 $\beta$ -HSD3 $\alpha$ | NM_200323.2      | ATGCCATCGAACAGCTTGGA     | AATTCACCTCTAGTAGCCATCG   |
| IGF-I                     | NM_131825.2      | GGCAAATCTCCACGATCTCTAC   | CGGTTTCTCTTGTCTCTCTCAG   |
| IGF-I $\alpha$            | NM_131433.1      | TCGTGTGTGGAGAAGATGGC     | ATGGTGTCTTGTGAAGAGCC     |
| $\beta$ -actin            | NM_181601.3      | ACTGTATTGTCTGGTGGTAC     | TACTCCTGCTTGCTAATCC      |
| rpl8                      | NM_200713.1      | TTGTTGGTGTGTTGCTGGT      | GGATGCTCAACAGGGTTCAT     |
