# Supplementary material for: The Mammalian “Obesogen” Tributyltin Targets Hepatic Triglyceride Accumulation and the Transcriptional Regulation of Lipid Metabolism in the Liver and Brain of Zebrafish
Source: PubMed Central journal article supplement (PMC4669123; doi:10.1371/journal.pone.0143911), 2015-12-03
Supplement: pone.0143911.s006.pdf [file pone.0143911.s006.pdf]

**S4 Table. Principal Component Analysis of the liver gene expression profile in TBT-exposed zebrafish.**

| <b>Gene correlations</b>  | <b>PC1<br/>(24.1%)</b>       | <b>PC2<br/>(17.9%)</b> | <b>PC3<br/>(11.0%)</b> | <b>PC4<br/>(10.0%)</b> | <b>PC5<br/>(6.8%)</b> |
|---------------------------|------------------------------|------------------------|------------------------|------------------------|-----------------------|
| RXR $\alpha$ /a           | 0.610*                       | -0.447*                | -0.062                 | 0.380*                 | -0.017                |
| PPAR $\gamma$             | 0.589*                       | -0.029                 | 0.308*                 | 0.365*                 | -0.308*               |
| DGAT2                     | 0.673*                       | -0.426*                | 0.006                  | 0.066                  | 0.188                 |
| FASn                      | 0.306                        | 0.771*                 | 0.159                  | 0.142                  | 0.022                 |
| C/EBP $\alpha$            | 0.347                        | -0.051                 | 0.384*                 | -0.659*                | -0.172                |
| C/EBP $\beta$             | 0.567*                       | -0.422*                | -0.289*                | -0.064                 | 0.300*                |
| ACOX1                     | 0.401*                       | 0.212                  | 0.331*                 | -0.340*                | 0.155                 |
| ACC $\alpha$              | 0.462*                       | 0.586*                 | -0.150                 | 0.038                  | -0.055                |
| SREBP1                    | -0.134                       | 0.826*                 | 0.146                  | 0.293*                 | 0.010                 |
| ChREBP                    | 0.361                        | -0.071                 | 0.446*                 | 0.545*                 | 0.267                 |
| IGF-I                     | 0.637*                       | 0.243                  | -0.447*                | -0.163                 | -0.094                |
| IGF-II $\alpha$           | 0.646*                       | -0.031                 | 0.006                  | -0.083                 | -0.604*               |
| 11 $\beta$ -HSD2          | 0.150                        | 0.282                  | -0.792*                | 0.128                  | 0.003                 |
| 11 $\beta$ -HSD3 $\alpha$ | 0.550*                       | 0.367                  | 0.052                  | -0.310*                | 0.485*                |
| <b>TBT (ng/L)</b>         | <b>Average scores on PCs</b> |                        |                        |                        |                       |
| <i>Males</i>              |                              |                        |                        |                        |                       |
| Control                   | 0.293                        | 0.0954                 | 0.6121                 | 0.1895                 | 0.4146                |
| 10                        | 0.8401                       | 0.7524 <sup>#</sup>    | 0.1329                 | 0.4282                 | -0.7398 <sup>#</sup>  |
| 50                        | -1.794 <sup>#</sup>          | 2.0617                 | 0.897 <sup>#</sup>     | 0.1949                 | 0.0504                |
| <i>Females</i>            |                              |                        |                        |                        |                       |
| Control                   | 0.1094                       | -0.5101                | -0.1473                | -0.6059                | 0.3139                |
| 10                        | 0.9133                       | -1.7933 <sup>†</sup>   | 0.0927                 | 0.4864                 | -0.4777               |
| 50                        | -0.3619                      | -0.4151                | -0.3632                | -0.3141                | 0.4386                |

\*indicates significant correlations and <sup>#</sup> significant differences compared to the control (n=8, <sup>#</sup>p<0.05, <sup>†</sup>p<0.1; one-way ANOVA followed by Dunnett's test)
