# Supplementary material for: The Mammalian “Obesogen” Tributyltin Targets Hepatic Triglyceride Accumulation and the Transcriptional Regulation of Lipid Metabolism in the Liver and Brain of Zebrafish
Source: PubMed Central journal article supplement (PMC4669123; doi:10.1371/journal.pone.0143911), 2015-12-03
Supplement: pone.0143911.s007.pdf [file pone.0143911.s007.pdf]

**S5 Table. Principal Component Analysis of the brain gene expression profile in TBT-exposed zebrafish.**

| <b>Gene correlations</b>  | <b>PC1<br/>(28.1%)</b>       | <b>PC2<br/>(15.2%)</b> | <b>PC3<br/>(10.4%)</b> | <b>PC4<br/>(9.5%)</b> | <b>PC5<br/>(7.3%)</b> |
|---------------------------|------------------------------|------------------------|------------------------|-----------------------|-----------------------|
| RXR $\alpha$ /a           | 0.692*                       | 0.0197                 | 0.448*                 | -0.2111               | 0.1965                |
| PPAR $\gamma$             | 0.0557                       | 0.5354*                | 0.1227                 | -0.5517*              | 0.2979                |
| DGAT2                     | 0.4546*                      | 0.278                  | 0.6361*                | 0.2442                | -0.1452               |
| FASn                      | 0.8679*                      | -0.246                 | -0.0803                | 0.0073                | 0.1142                |
| C/EBP $\alpha$            | 0.7077*                      | 0.3657                 | -0.1426                | 0.1436                | 0.1898                |
| C/EBP $\beta$             | -0.1968                      | 0.5737*                | 0.1577                 | -0.2567               | 0.3772*               |
| ACOX1                     | 0.6966*                      | -0.1349                | 0.0291                 | -0.2656               | -0.0978               |
| ACC $\alpha$              | 0.8134*                      | 0.0577                 | -0.1067                | 0.0905                | -0.3071*              |
| SREBP1                    | 0.4417*                      | -0.3527                | -0.4722*               | 0.2334                | 0.5201*               |
| ChREBP                    | 0.7317*                      | 0.028                  | 0.0749                 | 0.0716                | -0.131                |
| IGF-I                     | -0.1795                      | -0.2139                | 0.4257*                | 0.6146*               | 0.4865*               |
| IGF-II $\alpha$           | -0.0861                      | 0.5393*                | 0.0679                 | 0.2879                | -0.0206               |
| 11 $\beta$ -HSD2          | -0.1781                      | -0.6243*               | 0.5882*                | -0.0919               | -0.0886               |
| 11 $\beta$ -HSD3 $\alpha$ | -0.038                       | 0.6041                 | -0.0768                | 0.4738*               | -0.2139               |
| <b>TBT (ng/L)</b>         | <b>Average scores on PCs</b> |                        |                        |                       |                       |
| <i>Males</i>              |                              |                        |                        |                       |                       |
| Control                   | 1.2452                       | 1.0309                 | 0.5326                 | 0.2819                | -0.3656               |
| 10                        | -1.3753 <sup>#</sup>         | -0.2094                | -0.5757                | -0.5171               | -0.4775               |
| 50                        | 0.764                        | -0.9313 <sup>#</sup>   | -1.4772 <sup>#</sup>   | 0.8872                | 0.4224                |
| <i>Females</i>            |                              |                        |                        |                       |                       |
| Control                   | 1.159                        | 0.7599                 | 0.6676                 | 0.1025                | -0.3231               |
| 10                        | -1.9967 <sup>#</sup>         | 0.1849                 | 0.3335                 | -0.5143               | 0.3634                |
| 50                        | 0.2037                       | -0.835 <sup>#</sup>    | 0.5191                 | -0.2402               | 0.3804                |

\*indicates significant correlations and <sup>#</sup>significant differences compared to the control (n=8,  $p < 0.05$ ; one-way ANOVA followed by Dunnett's test)
