# Supplementary material for: The Mammalian “Obesogen” Tributyltin Targets Hepatic Triglyceride Accumulation and the Transcriptional Regulation of Lipid Metabolism in the Liver and Brain of Zebrafish
Source: PubMed Central journal article supplement (PMC4669123; doi:10.1371/journal.pone.0143911), 2015-12-03
Supplement: pone.0143911.s008.pdf [file pone.0143911.s008.pdf]

**S6 Table. Hepatic organotin levels.** Tributyltin (TBT), Dibutyltin (DBT) and Monobutyltin (MBT) levels in the liver of male and female zebrafish following chronic TBT exposure (9 months).

| ( $\mu\text{g/g w.w.}$ )                                                                                                                                                                                              | MBT  | DBT  | TBT  |
|-----------------------------------------------------------------------------------------------------------------------------------------------------------------------------------------------------------------------|------|------|------|
| <i>Males</i>                                                                                                                                                                                                          |      |      |      |
| Control (n=1)                                                                                                                                                                                                         | n.d. | n.d. | n.d. |
| TBT 10 ng/L (n=1)                                                                                                                                                                                                     | 1.1  | 7.3  | 3.0  |
| TBT 50 ng/L (n=2)                                                                                                                                                                                                     | 4.0  | 23.1 | 8.2  |
| <i>Females</i>                                                                                                                                                                                                        |      |      |      |
| Control (n=1)                                                                                                                                                                                                         | n.d. | n.d. | n.d. |
| TBT 10 ng/L (n=1)                                                                                                                                                                                                     | 2.2  | 7.9  | 2.0  |
| TBT 50 ng/L (n=3)                                                                                                                                                                                                     | 5.3  | 28.8 | 8.8  |
| Spare fish liver tissues from each exposure condition were pooled together to reach 0.05 g of dried sample; values are expressed in wet weight. Detection limits of assay (ng/g d.w.): MBT (232); DBT (132); TBT (75) |      |      |      |
