# Supplementary material for: The Mammalian “Obesogen” Tributyltin Targets Hepatic Triglyceride Accumulation and the Transcriptional Regulation of Lipid Metabolism in the Liver and Brain of Zebrafish
Source: PubMed Central journal article supplement (PMC4669123; doi:10.1371/journal.pone.0143911), 2015-12-03
Supplement: pone.0143911.s009.pdf [file pone.0143911.s009.pdf]

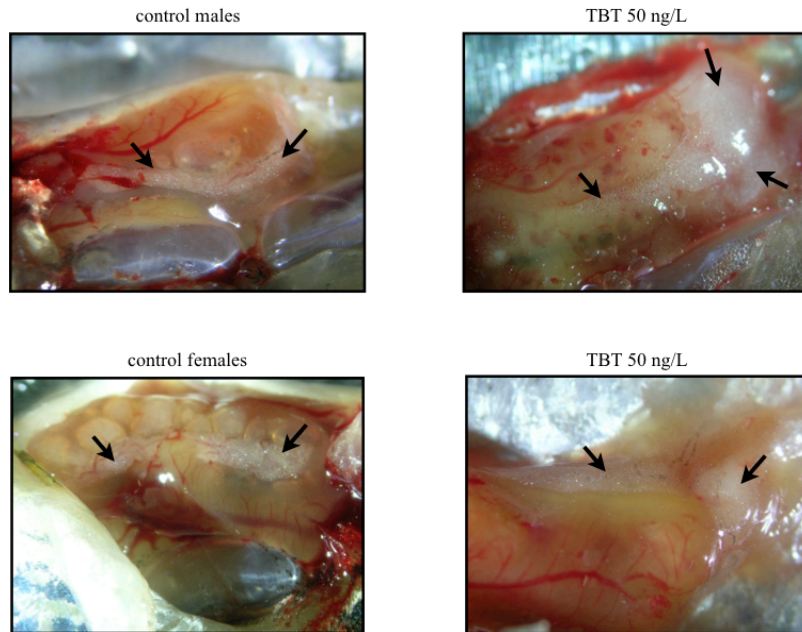

**S1 Figure. Visceral fat in TBT exposed zebrafish.** Zebrafish males and females exposed to TBT (50 ng/L as Sn) during their life cycle had visually more fat in the viscera than non-exposed fish.
